# Supplementary material for: Plasmonic Ag/Cu/PEG nanofluids prepared when solids meet liquids in the gas phase
Source: Royal Society of Chemistry journal article supplement (doi:10.1039/d2na00785a), 2022-12-22
Supplement: d2na00785a1.pdf [file d2na00785a1.pdf]

ARTICLE

## Plasmonic Ag/Cu/PEG Nanofluids Prepared when Solids Meet Liquid in the Gas Phase

Received 00th January 20xx,  
Accepted 00th January 20xx

DOI: 10.1039/x0xx00000x

Kateryna Biliak,<sup>a</sup> Daniil Nikitin,<sup>a</sup> Suren Ali-Ogly,<sup>a</sup> Mariia Protsak,<sup>a</sup> Pavel Pleskunov,<sup>a</sup> Marco Tosca,<sup>a,b</sup> Anastasiya Sergievskaya,<sup>c</sup> David Cornil,<sup>d</sup> Jérôme Cornil,<sup>d</sup> Stephanos Konstantinidis,<sup>c</sup> Tereza Košutová,<sup>e</sup> Zulfiya Černochová,<sup>f</sup> Petr Štěpánek,<sup>f</sup> Jan Hanuš,<sup>a</sup> Jaroslav Kousal,<sup>a</sup> Lenka Hanyková,<sup>a</sup> Ivan Krakovský<sup>a</sup> and Andrei Choukourov\*<sup>a</sup>

### Supplementary information

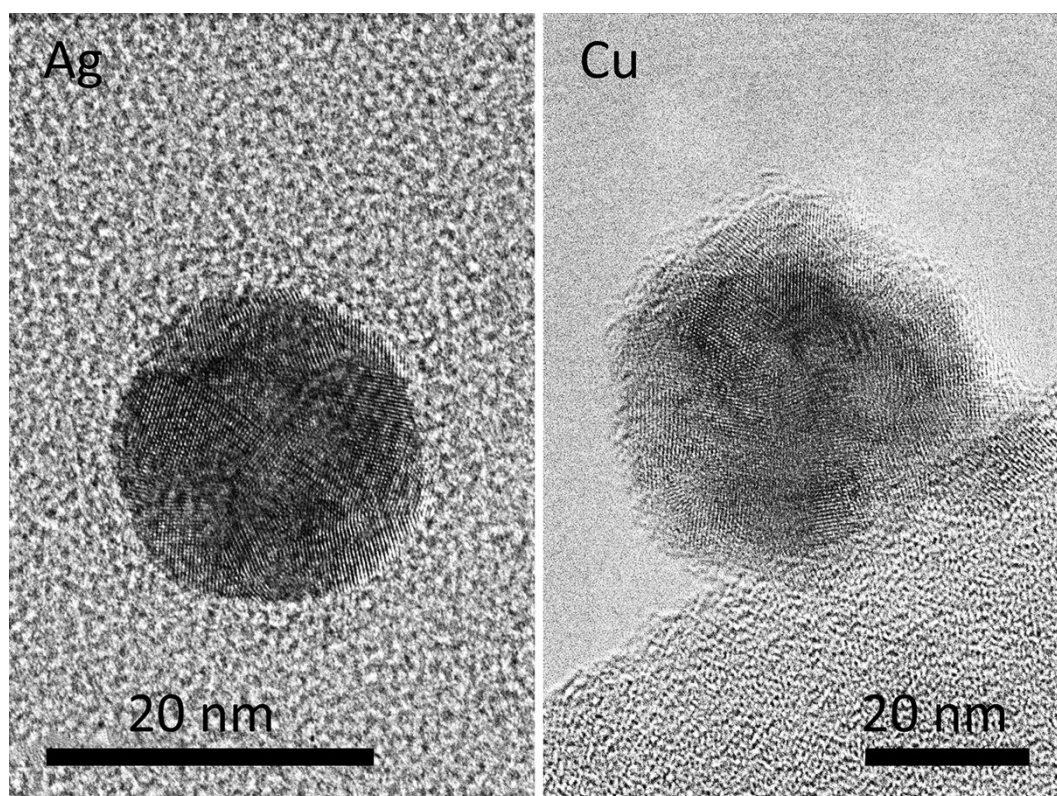

Figure S 1 High-resolution TEM images of Ag and Cu NPs prepared by dc magnetron sputtering using GAS.

<sup>a</sup> Department of Macromolecular Physics, Faculty of Mathematics and Physics, Charles University, V Holešovičkách 2, 180 00, Prague, Czech Republic

<sup>b</sup> ELI-Beamlines Centre, Institute of Physics, Czech Academy of Sciences, Dolní Brezany, Czech Republic

<sup>c</sup> Plasma-Surface Interaction Chemistry (ChIPS), University of Mons, Place du Parc 20, 7000 Mons, Belgium

<sup>d</sup> Laboratory for Chemistry of Novel Materials, University of Mons, Place du Parc 23, B-7000 Mons, Belgium

<sup>e</sup> Department of Condensed Matter Physics, Faculty of Mathematics and Physics, Charles University, Ke Karlovu 5, 121 16, Prague, Czech Republic

<sup>f</sup> Institute of Macromolecular Chemistry, Czech Academy of Sciences, Heyrovského nám. 2, 162 06, Prague, Czech Republic

\* Corresponding author: choukourov@kmf.troja.mff.cuni.cz

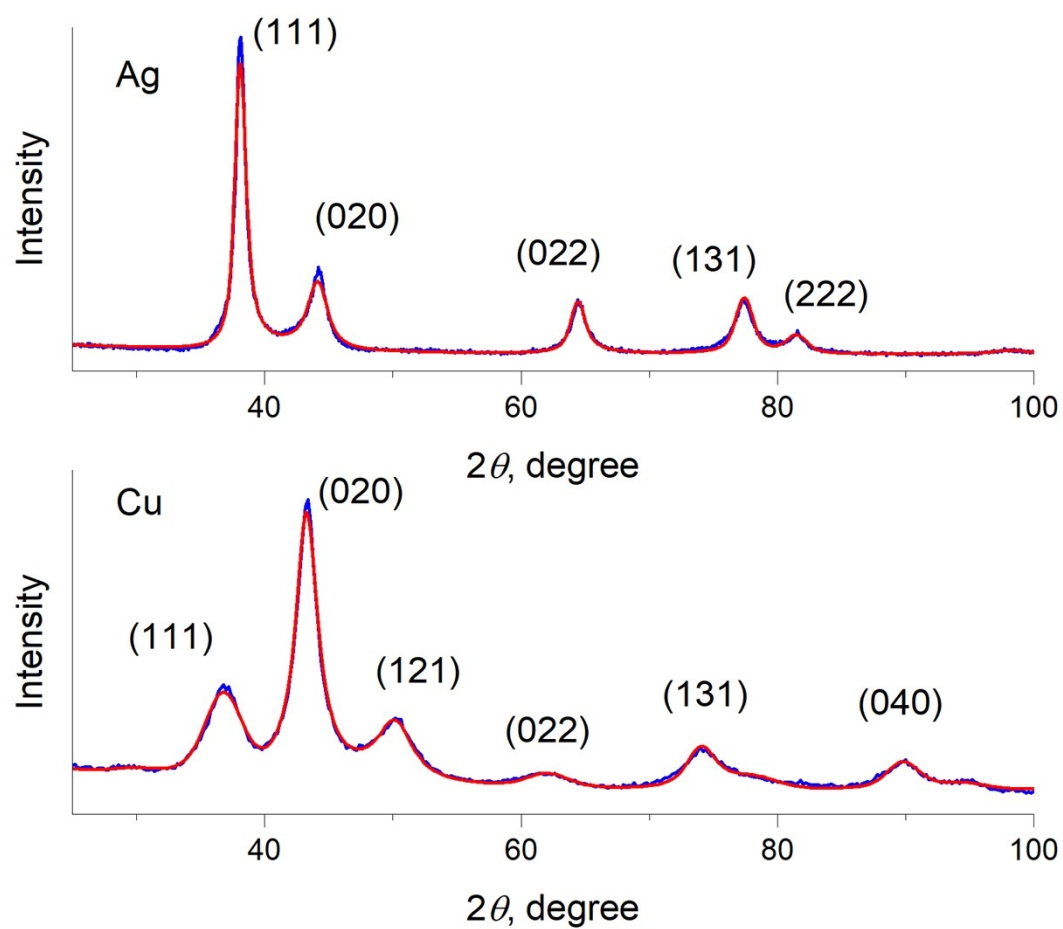

Figure S 2 XRD patterns obtained on Ag and Cu NPs. Blue curves are data, red curves are fits.
